1 **Assessment of Phenotype Microarray plates for rapid and high-throughput**  
2 **analysis of collateral sensitivity networks**

3

4 Elsie J. Dunkley<sup>1</sup>, James D. Chalmers<sup>2</sup>, Stephanie Cho<sup>2</sup>, Thomas J. Finn<sup>2</sup>, Wayne M.  
5 Patrick<sup>1,2\*</sup>

6

7 <sup>1</sup>Centre for Biodiscovery, School of Biological Sciences, Victoria University, Wellington,  
8 New Zealand.

9 <sup>2</sup>Department of Biochemistry, University of Otago, Dunedin, New Zealand.

10

11 \*wayne.patrick@vuw.ac.nz

12

13

14 **ABSTRACT**

15

16 The crisis of antimicrobial resistance is driving research into the phenomenon of collateral  
17 sensitivity. Sometimes, when a bacterium evolves resistance to one antimicrobial, it becomes  
18 sensitive to others. In this study, we have investigated the utility of Phenotype Microarray  
19 (PM) plates for identifying collateral sensitivities with unprecedented throughput. We  
20 assessed the relative resistance/sensitivity phenotypes of nine strains of *Staphylococcus*  
21 *aureus* (two laboratory strains and seven clinical isolates) towards the 72 antimicrobials  
22 contained in three PM plates. In general, the PM plates reported on resistance and sensitivity  
23 with a high degree of reproducibility. However, a rigorous comparison of PM growth  
24 phenotypes with minimum inhibitory concentration (MIC) measurements revealed a trade-off  
25 between throughput and accuracy. Small differences in PM growth phenotype did not  
26 necessarily correlate with changes in MIC. Thus, we conclude that PM plates are useful for  
27 the rapid and high-throughput assessment of large changes in collateral sensitivity  
28 phenotypes during the evolution of antimicrobial resistance, but more subtle examples of  
29 cross-resistance or collateral sensitivity cannot be reliably identified using this approach.

## 30 INTRODUCTION

31

32 Collateral sensitivity is when bacteria develop resistance to one antibiotic, and in doing so  
33 increase their susceptibility to one or more others. The phenomenon was first observed in  
34 1952 [1] but it was largely ignored in the subsequent decades. With the emergence of the  
35 antimicrobial resistance crisis, collateral sensitivity has garnered new attention because it  
36 offers the potential to preserve the utility of our diminishing supply of antibiotics [2-4]. Were  
37 collateral sensitivity to be understood in a systematic and predictable manner, a clinician  
38 could treat a persistent infection by cycling through antibiotics in such a way that the second  
39 antibiotic was chosen for its enhanced efficacy against resistant microorganisms that develop  
40 during treatment with the first.

41

42 Many studies into the potential of collateral sensitivity have focused on strains of *Escherichia*  
43 *coli* [5-8], *Pseudomonas aeruginosa* [9] or *Staphylococcus aureus* [10, 11] that were  
44 subjected to evolution *in vitro*. In each case, a strain was exposed to one antibiotic, resistant  
45 mutants were isolated, and their sensitivities towards up to 25 other antibiotics were tested.  
46 The clinical relevance of this *in vitro* approach has been questioned because of the  
47 stochasticity of evolution [12] and because it emphasises mutationally acquired resistance,  
48 rather than the more common scenario of horizontally transferred resistance [13]. In turn, this  
49 has led to studies seeking to identify collateral sensitivities that are more directly relevant in  
50 clinical settings. For example, 10 genetically-diverse clinical urinary tract isolates of *E. coli*  
51 showed broadly conserved patterns of collateral sensitivity to a panel of 16 antimicrobials  
52 [14]. With evidence accumulating that collateral sensitivities may indeed be predictable [15,  
53 16] – but with outstanding questions about how to apply this knowledge – the field is primed  
54 to advance rapidly.

55

56 In this work we aimed to develop, implement and validate a high-throughput screen for  
57 collateral sensitivities. Agar dilution and broth dilution methods [17] to determine differences  
58 in minimum inhibitory concentration (MIC) are highly accurate but labour intensive. As a  
59 result, it is unusual for any given study to test for collateral sensitivities towards >20  
60 antimicrobials. We hypothesised that higher throughput experiments might reveal previously-  
61 overlooked sensitivities, which in turn could help to accelerate the field.

62

63 Phenotype Microarray (PM) plates have become a widely used tool for phenotypic  
64 characterization of microorganisms [18, 19]. Each 96-well PM plate contains different  
65 nutrient sources, growth additives or, in the case of PM plates 11-20, antimicrobial  
66 compounds. Each of PM plates 11 to 20 contains 24 antimicrobials, present at different  
67 concentrations in four wells. A redox dye is added to each well, which changes from  
68 colourless to purple in response to microbial metabolic activity. The rate of colour formation  
69 can be monitored automatically using an OmniLog instrument; however, we and others have  
70 successfully scored colour development by eye [18, 20-22]. Persistent, well-specific  
71 variability has also been observed in OmniLog data collected for plates PM 1-10 [23],  
72 suggesting that data collection by eye or by OmniLog is equally valid. We set out to assess  
73 whether PM plates could provide sensitive and reproducible enough data to be useful in  
74 building collateral sensitivity networks. We concentrated on scoring growth data by eye, in  
75 order to develop a protocol with the broadest possible applicability.

76

77 In our proof-of-principle experiments, we have focused on the Gram-positive bacterium, *S.*  
78 *aureus*. We have compared resistance and sensitivity to 72 antimicrobials (three PM plates)  
79 between seven clinical isolates of methicillin-resistant *S. aureus* (MRSA), one laboratory  
80 strain, and one descendent of this strain that was evolved *in vitro* towards oxacillin resistance.  
81 Overall we found PM plates to provide reproducible data, although their correlation with  
82 broth microdilution was more variable.

83

84

## 85 **MATERIALS AND METHODS**

86

### 87 **Materials**

88

89 Antibiotics and other specialty chemicals were from Sigma-Aldrich (St Louis, MO, USA)  
90 unless noted otherwise. Cefazolin, demeclocycline and oxacillin were from Melford  
91 Laboratories (Ipswich, Suffolk, UK).

92

93 Phenotype Microarray plates (Biolog, Hayward, CA, USA) were used for chemical  
94 sensitivity testing. PM plates 11-13 were used as these cover a range of common and  
95 clinically relevant antibiotics, as well as other antimicrobial compounds.

96

## 97 **General microbiological methods**

98

99 *S. aureus* was cultured in Mueller-Hinton (MH) medium (ForMedium, Hunstanton, UK) at  
100 37°C. Seven isolates of community-acquired MRSA were obtained from the collection held  
101 at Christchurch Hospital, New Zealand. These were identified as MRSA-BE, -BK, -BR, -SO,  
102 -SY, -TT and -UB. The laboratory strain *S. aureus* ATCC 25923 was tested in parallel.  
103 Further, *S. aureus* ATCC 25923 was evolved to be more oxacillin resistant by serial  
104 passaging. An MH broth culture (1 mL) was incubated at 37°C until the optical density  
105 (OD<sub>600</sub>) exceeded 1.0. Then a 10 µL aliquot was used to inoculate a new 1 mL culture with an  
106 increased oxacillin concentration. Serial passaging continued until no further bacterial growth  
107 was observed and the resulting isolate was termed 25923evo.

108

## 109 **Phenotype microarrays**

110

111 Cell lines to be assayed were cultured overnight in 3 mL of MH broth. Each saturated culture  
112 was diluted to an OD<sub>600</sub> of  $0.5 \pm 0.05$ , for use as the PM plate inoculum as described below.

113

114 Each batch of three PM plates was prepared based upon the manufacturer's protocol for  
115 Gram-positive bacteria. Inoculum solution A (6 ml, total volume) was assembled by  
116 combining 1 ml of diluted overnight culture with inoculating fluid IF-0 (sold by Biolog at  
117 1.2× concentration) and redox Dye H (sold by Biolog at 100× concentration).

118

119 A Gram-positive additive solution (12× concentration) was made, which comprised 24 mM  
120 MgCl<sub>2</sub>, 12 mM CaCl<sub>2</sub>, 0.06% (w/v) yeast extract, 0.06% (v/v) Tween 80, 30 mM D-glucose  
121 and 60 mM sodium pyruvate.

122

123 Inoculum solution B (35 ml, total volume) was prepared by combining the following  
124 components: 29.2 ml of inoculating fluid IF-10b (Biolog; sold as a 1.2× stock); 2.92 ml of the  
125 Gram-positive additive solution; 350 µl of Dye H (100× stock); and 2.53 ml of inoculum  
126 solution A (described above). Aliquots of inoculum solution B (100 µl) were dispensed into  
127 each well of PM plates 11-13. Plates were incubated for 24 h at 37°C without shaking.

128

129 After incubation, growth in each well was scored by eye. Each well was given a score out of  
130 2: 0 for colourless (no growth); 1 for light purple (intermediate growth); and 2 for dark purple  
131 (full growth). Each antimicrobial was present in four wells at increasing concentrations.  
132 Growth scores across the four wells were summed. Maximal resistance therefore  
133 corresponded to a growth score of 8, whereas a growth score of 0 corresponded to complete  
134 sensitivity.

135

### 136 **Determination of minimum inhibitory concentrations**

137

138 Minimum inhibitory concentrations (MICs) for six antimicrobial compounds were  
139 determined by the broth microdilution method, as described previously [17, 20]. The first  
140 column of wells in a 96-well plate was filled with 200  $\mu$ l of MH broth plus the antimicrobial  
141 at the maximum concentration to be tested. The remaining wells contained 100  $\mu$ l MH broth.  
142 This was used to begin a two-fold dilution series, which covered 12 concentrations. A 100  $\mu$ l  
143 aliquot from column 1 was transferred into the wells in column 2, pipetted up and down to  
144 mix, and repeated for the remaining rows. A 3- $\mu$ l aliquot of saturated cell culture, diluted to  
145  $OD_{600} = 0.5$ , was used to inoculate each well. Plates were sealed with a breathable membrane  
146 (Aeraseal) and incubated in an Incumix plate shaker (Select Bioproducts) at 37°C and 600  
147 rpm for 16 h. The percentage of growth inhibition in each well was calculated by measuring  
148  $OD_{600}$  in a plate reader (PerkinElmer) and comparing it to a blank and a well with no  
149 antibiotic, according to the following formula (Clinical and Laboratory Standards Institute,  
150 <https://clsi.org/>):

151

152 *Percentage inhibition =  $100 \times (OD_{600} \text{ of untreated well} - OD_{600} \text{ of well at known}$*   
153 *concentration plus cells) / (OD<sub>600</sub> of untreated well - OD<sub>600</sub> of blank).*

154

155 The first well which showed  $\geq 95\%$  inhibition was deemed to be the MIC cut-off for that  
156 isolate.

## 157 RESULTS

158

159 We assessed the accuracy of PM plates for the discovery of collateral sensitivity networks by  
160 assaying seven clinical isolates and two laboratory strains of *S. aureus*. We set out to test two  
161 aspects of the accuracy of these assays: reproducibility and reliability. Reproducibility was  
162 tested by comparing independent biological replicates in duplicate microarray assays.  
163 Reliability was assessed by correlating the relative levels of resistance observed in PM assays  
164 with MICs determined using the broth microdilution method [17], which is a particularly  
165 common test used in clinical settings [24].

166

### 167 Reproducibility

168

169 All nine strains of *S. aureus* were assayed in duplicate using PM plates 11-13. In total, this  
170 experiment therefore probed 648 combinations (9 strains  $\times$  72 antimicrobials). The  
171 antimicrobials in PM plates 11-13 were grouped according to their mode of action: cell wall-  
172 acting antibiotics (16 compounds); protein synthesis inhibitors (22 compounds); inhibitors of  
173 nucleic acid synthesis (11 compounds); repurposed cancer and anti-psychotic drugs (7  
174 compounds); and others including antiseptics, disinfectants and metal ions (16 compounds).  
175 The full list of compounds is provided in the Supporting Information (S1 Table). As  
176 described in the Materials and Methods, relative resistance to each antimicrobial was  
177 assessed using a growth score that ranged from 0 (completely sensitive) to 8 (maximally  
178 resistant). Independent duplicates were performed several weeks apart. Examples of the PM  
179 assays are depicted in Fig 1.

180

181

182 **Fig. 1. Examples of growth in phenotype microarray plates.** The growth of *S. aureus* ATCC 25923  
183 in four wells of increasing enoxacin, erythromycin and doxycycline concentrations is shown. The  
184 intensity of colour development (due to the presence of a redox dye) was scored by eye, 24 h after  
185 inoculation. It was scored as either 0 (no growth), 1 (intermediate growth) or 2 (full growth). Summing  
186 the growth in all four wells yielded a score out of 8 for each antimicrobial. In the examples shown,  
187 growths scores of 8, 2 and 3 were recorded for enoxacin, erythromycin and doxycycline, respectively.

188

189

190 Overall, the PM data revealed high levels of resistance in all *S. aureus* strains to many of the  
191 compounds tested (Fig 2 and S1-S5 Fig, Supporting Information). As expected, for example,  
192 the aminoglycosides were not effective against this Gram-positive bacterium (S2 Fig).

193 Comparing the MRSA isolates with *S. aureus* ATCC 25923 revealed hints of collateral  
194 sensitivity; for example, the MRSA isolates all appeared more sensitive to doxycycline (S2  
195 Fig) and 5-fluorouracil (S4 Fig). As expected, *S. aureus* ATCC 25923 showed a low level of  
196 oxacillin resistance (average growth score = 1.5), whereas the strain evolved from it in the  
197 presence of oxacillin (25923evo) showed increased resistance (growth score = 3).

198

199

200 **Fig. 2. Phenotype microarray plates yield reproducible resistance/sensitivity data.** The plot  
201 summarizes 1,296 PM growth assays: 72 antimicrobials × 9 *S. aureus* strains, each done in biological  
202 duplicate. Each symbol represents the median PM growth score, with the error bars showing the  
203 range of the two scores. In 544 of 648 antimicrobial/strain combinations, scores were identical in  
204 duplicate assays. In only 29 cases do the error bars span more than one point on the 8-point scale.  
205

206

207 Comparing the replicated sets of PM data revealed that the growth scores for each  
208 antimicrobial were identical between duplicates 84% of the time (Fig 2). When the growth  
209 scores were different, it was most commonly only by one point on the 8-point scale. The  
210 scores differed by one point 11.5% of the time, and only differed by more than one point in  
211 4.5% of the duplicated assays (29 of 648 combinations). Most of the variability in duplicates  
212 was observed for the  $\beta$ -lactams, the tetracyclines and the metal chlorides. In one extreme  
213 case, 25923evo returned growth scores of 0 and 8 in duplicate vancomycin tests. The other  
214 eight *S. aureus* strains showed reproducible growth scores of 0 for vancomycin, suggesting to  
215 us that the score of 8 was the result of a technical or manufacturing error. The overarching  
216 conclusion of this experiment was that PM plates yield reproducible data on relative  
217 resistance and sensitivity, across both clinical and laboratory strains of *S. aureus*.

218

## 219 **Correlation with broth microdilution**

220

221 PM plates have been compared favourably against disc diffusion, broth microdilution or  
222 molecular methods in terms of throughput, chemical use and time cost [25]. However, the  
223 same authors also pointed out that PM plates are best used for preliminary estimates of  
224 inhibitory concentrations. We wanted to gauge whether PM assays are sensitive and accurate  
225 enough to discover novel collateral sensitivities and build large-scale resistance/sensitivity  
226 networks. Therefore, we compared the output from our PM assays with classical MIC  
227 determination by broth microdilution.

228



229 Within our resistance/sensitivity network (S1-S5 Fig) we noted that the nine *S. aureus* strains  
230 responded very similarly to some compounds, but for others the response was highly  
231 variable. For example, the clinical isolates MRSA-BR and MRSA-TT were highly resistant to  
232 erythromycin (average growth scores of 8 and 7.5 respectively) while most of the other  
233 strains we tested were relatively sensitive (growth scores of 2 to 4). On the other hand, all  
234 nine strains showed moderate-to-high levels of resistance to ceftazidime (growth scores of 5.5  
235 to 8). This reproducible inter-strain variability in the PM data provided us with a way to  
236 rigorously assess the degree of correlation with broth microdilution.

237

238 We selected six antimicrobial compounds to analyze in more detail. Erythromycin and  
239 oxacillin had highly variable efficacies against the nine *S. aureus* strains. Nickel chloride and  
240 2,2'-dipyridyl elicited moderate variability in growth scores between strains. Cefazolin and  
241 demeclocycline had relatively uniform efficacies against all strains. The growth scores for  
242 each strain against each of these six antimicrobials are summarized in Fig 3. In order to  
243 appraise the sensitivity and accuracy of our PM assays, we also determined the MICs for  
244 these six compounds. Our goal was to assess whether the large and small growth differences  
245 we observed in the wells of PM plates truly reflected differences in antimicrobial  
246 resistance/sensitivity.

247

248

249 **Fig 3. Phenotype microarray growth scores for nine *S. aureus* strains in the presence of six**  
250 **different antimicrobials.** The radial axis depicts the average growth score from independent  
251 duplicates. The growth scores of the seven MRSA clinical isolates are plotted in shades of blue and  
252 green. Data for the laboratory strain *S. aureus* ATCC 25923 and its evolved descendent, 25923evo,  
253 are plotted in orange and red.

254

255

256 The comparison of PM growth scores and broth microdilution MICs is shown in Fig 4. In  
257 general, large differences in PM growth score faithfully reflected large differences in MIC.  
258 For example, a high growth score for erythromycin (8 or 7.5) corresponded to an MIC of 128  
259  $\mu\text{g/ml}$ , whereas a low growth score (2) corresponded to MICs of 8  $\mu\text{g/ml}$  or less. At the same  
260 time, the correlation between PM growth score and MIC was far from perfect. The five  
261 strains that showed a growth score of 2 in erythromycin-containing PM wells varied in their  
262 MICs from 2  $\mu\text{g/ml}$  (MRSA-SO) to 8  $\mu\text{g/ml}$  (MRSA-BE and MRSA-UB). Another strain  
263 with an MIC of 8  $\mu\text{g/ml}$  (MRSA-SY) had a growth score of 4, not 2.

264



265

266 **Fig 4. Heat map to correlate PM growth scores and MICs for nine *S. aureus* strains and six**  
267 **antimicrobials.** PM growth scores are shaded from dark red (score = 8) to white (score = 0). MICs  
268 are also colour-coded, to highlight their level of agreement or disagreement with the corresponding  
269 growth score. Compounds are grouped according to the level of variability the nine strains showed in  
270 their PM growth scores.

271

272

273 This pattern was consistent across clinical and laboratory strains, and across all of the  
274 antimicrobials tested. Results on the polar ends of each scale were more consistent than  
275 intermediary scores. For 5 out of the 6 antimicrobials, the highest MICs were directly  
276 correlated with the highest PM growth scores (darkest shading in Fig 4). The outlier was  
277 MRSA-SY, which reproducibly failed to grow in any oxacillin-containing PM well, but  
278 which was highly resistant to oxacillin (MIC = 64 µg/ml) in replicated broth microdilution  
279 assays. Similarly, for 5 of the antimicrobials, the lowest MICs were reflected in the lowest  
280 PM growth scores (lightest shading in Fig 4). The exception was 2,2'-dipyridyl, for which the  
281 most sensitive strain (*S. aureus* ATCC 25923, MIC = 32 µg/ml) grew unusually well in the  
282 PM assay (growth score = 7).

283

284 On the other hand, differences in PM growth score of less than 2 units could not reliably  
285 predict differences in MIC. For example, growth scores of 4, 5 or 6 could all correspond to a  
286 demeclocycline MIC of 0.0156 µg/ml (Fig 4). Similarly, growth scores of 5, 7 or even 7.5  
287 could correspond to a nickel chloride MIC of 64 µg/ml.

288

289 The manufacturer of PM plates (Biolog Inc.) does not disclose the concentrations of  
290 compounds in their plates. The sizes of the incremental increases in concentration across the  
291 four PM wells are also unknown for each compound. Not knowing the working range of  
292 concentrations complicates the use of PM plates to assess sensitivity/resistance networks. For  
293 example, six of the nine *S. aureus* strains showed full growth in all four cefazolin-containing  
294 PM wells; that is, they had growth scores of 8. However, the cefazolin MICs of these strains  
295 ranged from 1 µg/ml to 16 µg/ml (Fig 4). The most likely explanation is that the four PM  
296 wells containing cefazolin range from a very low concentration up to, perhaps, 0.5 µg/ml. If  
297 this is the case, any strain with an MIC > 0.5 µg/ml will show full growth in all four wells;  
298 however, it becomes impossible to assess the relative resistance or sensitivity of any strain  
299 that fulfils this criterion.

## 300 DISCUSSION

301

302 This study has emphasized the power – and potential pitfalls – of PM plates for the large-  
303 scale assessment of cross resistance and collateral sensitivity. We were able to rapidly obtain  
304 resistance and sensitivity data for 72 antimicrobials, which is many more than have been  
305 tested in previous studies [8, 12, 14, 15]. It would be straightforward to expand our approach  
306 to more of the antimicrobial-containing PM plates. In total, plates 11-20 contain 237  
307 antimicrobials; testing the entire set would represent an order of magnitude increase in  
308 screening breadth compared to current approaches. Moreover, scoring PM growth by eye (Fig  
309 1) proved to be a fast, technically straightforward, cost effective and reproducible way to  
310 collect resistance and sensitivity data. In independent duplicates, carried out several weeks  
311 apart, we obtained identical growth scores in 544 of 648 antimicrobial/strain combinations.  
312 Of the remaining combinations, 75 differed by a single point on our 8-point growth scale (Fig  
313 2). This corresponded to the difference between no growth and intermediate growth, or  
314 intermediate growth and full growth, in one of the four wells containing a given  
315 antimicrobial.

316

317 When PM growth scores were carefully compared with MIC data obtained by broth  
318 microdilution, a trade-off between throughput and accuracy became apparent. Small  
319 differences in PM growth score did not reliably correlate with MIC. Our data suggest that a  
320 difference in growth score of at least 2 points is required to indicate a genuine difference in  
321 MIC between two *S. aureus* strains. For example, the PM assays suggested that many of the  
322 MRSA strains were more sensitive to demeclocycline, nickel chloride or 2,2'-dipyridyl than  
323 the laboratory strain *S. aureus* ATCC 25923 (Fig 3). However, the differences in PM growth  
324 score were small and the evidence for increased sensitivity was not borne out by MIC testing  
325 (Fig 4). The level of agreement (or disagreement) between PM scores and MICs was  
326 comparable for the clinical isolates of MRSA and the laboratory strains *S. aureus* 25923 and  
327 25923evo. For the purpose of discovering novel collateral sensitivities, the power of these  
328 assays appears to be limited to detecting large reductions in resistance. With one exception  
329 (MRSA-SY in oxacillin), differences of  $\geq 16$ -fold in MIC between any two strains were  
330 always correlated with differences in PM growth.

331

332 Our results build on previous findings that laboratory strains are not necessarily good models  
333 for exploring collateral sensitivity in the clinical setting [12, 26]. Our laboratory-evolved,  
334 oxacillin-resistant strain 25923evo frequently behaved closer to its parent, *S. aureus* ATCC  
335 25923, than to the clinical MRSA isolates. Collateral sensitivities could not be extrapolated  
336 from 25923evo to the MRSA isolates, either from PM results or from MIC data.

337

338 There remains a chasm between the expanding body of laboratory research into collateral  
339 sensitivity and the implementation of this research as a therapeutic strategy. A high-  
340 throughput assay using PM plates could go some way towards bridging this gap. The assay  
341 we have implemented here offers speed and breadth, and is capable of reproducibly  
342 identifying large differences in cross-resistance or collateral sensitivity between otherwise  
343 closely-related strains.

344

345

## 346 **ACKNOWLEDGEMENTS**

347

348 We gratefully acknowledge Prof Stephen Chambers (Director of Infectious Diseases,  
349 Christchurch Hospital, New Zealand) and Rosie Greenlees (Canterbury District Health  
350 Board) for providing us with the MRSA isolates used in this study. Financial support for this  
351 work was received from the Otago Medical Research Foundation, the Maurice and Phyllis  
352 Paykel Trust and the Wellington Medical Research Foundation.

353

354

## 355 **REFERENCES**

356

- 357 1. Szybalski W, Bryson V. Genetic studies on microbial cross resistance to toxic agents. I.  
358 Cross resistance of *Escherichia coli* to fifteen antibiotics. J Bacteriol. 1952;64:489-99.
- 359 2. Hancock RE. Collateral damage. Nat Biotechnol. 2014;32:66-8.
- 360 3. Pál C, Papp B, Lázár V. Collateral sensitivity of antibiotic-resistant microbes. Trends  
361 Microbiol. 2015;23:401-7.
- 362 4. Baym M, Stone LK, Kishony R. Multidrug evolutionary strategies to reverse antibiotic  
363 resistance. Science. 2016;351:aad3292.

- 364 5. Imamovic L, Sommer MO. Use of collateral sensitivity networks to design drug cycling  
365 protocols that avoid resistance development. *Sci Transl Med.* 2013;5:204ra132.
- 366 6. Lázár V, Singh GP, Spohn R, Nagy I, Horváth B, Hrtyan M, et al. Bacterial evolution of  
367 antibiotic hypersensitivity. *Mol Syst Biol.* 2013;9:700.
- 368 7. Oz T, Guvenek A, Yildiz S, Karaboga E, Tamer YT, Mumcuyan N, et al. Strength of  
369 selection pressure is an important parameter contributing to the complexity of antibiotic  
370 resistance evolution. *Mol Biol Evol.* 2014;31:2387-401.
- 371 8. Suzuki S, Horinouchi T, Furusawa C. Prediction of antibiotic resistance by gene  
372 expression profiles. *Nat Commun.* 2014;5:5792.
- 373 9. Yen P, Papin JA. History of antibiotic adaptation influences microbial evolutionary  
374 dynamics during subsequent treatment. *PLoS Biol.* 2017;15:e2001586.
- 375 10. Kim S, Lieberman TD, Kishony R. Alternating antibiotic treatments constrain  
376 evolutionary paths to multidrug resistance. *Proc Natl Acad Sci USA.* 2014;111:14494-9.
- 377 11. Rodriguez de Evgrafov M, Gumpert H, Munck C, Thomsen TT, Sommer MO. Collateral  
378 resistance and sensitivity modulate evolution of high-level resistance to drug  
379 combination treatment in *Staphylococcus aureus*. *Mol Biol Evol.* 2015;32:1175-85.
- 380 12. Nichol D, Rutter J, Bryant C, Hujer AM, Lek S, Adams MD, et al. Antibiotic collateral  
381 sensitivity is contingent on the repeatability of evolution. *Nat Commun.* 2019;10:334.
- 382 13. Hughes D, Andersson DI. Evolutionary consequences of drug resistance: Shared  
383 principles across diverse targets and organisms. *Nature Reviews Genetics.* 2015;16:459-  
384 71.
- 385 14. Podnecky NL, Fredheim EGA, Kloos J, Sørum V, Primicerio R, Roberts AP, et al.  
386 Conserved collateral antibiotic susceptibility networks in diverse clinical strains of  
387 *Escherichia coli*. *Nat Commun.* 2018;9:3673.
- 388 15. Imamovic L, Ellabaan MMH, Dantas Machado AM, Citterio L, Wulff T, Molin S, et al.  
389 Drug-driven phenotypic convergence supports rational treatment strategies of chronic  
390 infections. *Cell.* 2018;172:121-34 e14.

- 391 16. Rosenkilde CEH, Munck C, Porse A, Linkevicius M, Andersson DI, Sommer MOA.  
392 Collateral sensitivity constrains resistance evolution of the CTX-M-15 beta-lactamase.  
393 Nat Commun. 2019;10:618.
- 394 17. Wiegand I, Hilpert K, Hancock RE. Agar and broth dilution methods to determine the  
395 minimal inhibitory concentration (MIC) of antimicrobial substances. Nat Protoc.  
396 2008;3:163-75.
- 397 18. Bochner BR, Gadzinski P, Panomitros E. Phenotype microarrays for high-throughput  
398 phenotypic testing and assay of gene function. Genome Res. 2001;11:1246-55.
- 399 19. Bochner BR. Global phenotypic characterization of bacteria. FEMS Microbiol Rev.  
400 2009;33:191-205.
- 401 20. Soo VWC, Hanson-Manful P, Patrick WM. Artificial gene amplification reveals an  
402 abundance of promiscuous resistance determinants in *Escherichia coli*. Proc Natl Acad  
403 Sci USA. 2011;108:1484-9.
- 404 21. Garland JL. Analytical approaches to the characterization of samples of microbial  
405 communities using patterns of potential C source utilization. Soil Biol Biochem.  
406 1996;28:213-21.
- 407 22. Blumenstein K, Macaya-Sanz D, Martín JA, Albrechtsen BR, Witzell J. Phenotype  
408 MicroArrays as a complementary tool to next generation sequencing for characterization  
409 of tree endophytes. Front Microbiol. 2015;6:1033.
- 410 23. Johnson DA, Tetu SG, Phillippy K, Chen J, Ren Q, Paulsen IT. High-throughput  
411 phenotypic characterization of *Pseudomonas aeruginosa* membrane transport genes.  
412 PLoS Genet. 2008;4:e1000211.
- 413 24. Jorgensen JH, Ferraro MJ. Antimicrobial susceptibility testing: a review of general  
414 principles and contemporary practices. Clin Infect Dis. 2009;49:1749-55.
- 415 25. Jałowiecki Ł, Chojniak J, Dorgeloh E, Hegedusova B, Ejhed H, Magnér J, et al. Using  
416 phenotype microarrays in the assessment of the antibiotic susceptibility profile of  
417 bacteria isolated from wastewater in on-site treatment facilities. Folia Microbiol.  
418 2017;62:453-61.

419 26. Obolski U, Dellus-Gur E, Stein GY, Hadany L. Antibiotic cross-resistance in the lab and  
420 resistance co-occurrence in the clinic: discrepancies and implications in *E. coli*. Infect  
421 Genet Evol. 2016;40:155-61.

422

423

## 424 SUPPORTING INFORMATION

425

426 **S1 Table. Full list of antimicrobial compounds tested in PM plates 11, 12 and 13,**  
427 **grouped according to mode of action.**

428

429 **S1 Fig. Phenotype microarray growth scores for nine *S. aureus* strains in the presence of**  
430 **cell wall-acting antibiotics.** Scores are an average of two biological replicates, with 8  
431 representing maximum relative resistance around the exterior of the radar and 0 representing  
432 complete sensitivity at the centre. MRSA isolates are in shades of blue and green. Laboratory  
433 strains *S. aureus* ATCC 25923 and 25923evo are orange and red respectively.

434

435 **S2 Fig. Phenotype microarray scores for nine *S. aureus* strains in the presence of**  
436 **protein synthesis-inhibiting antibiotics.** Scores are an average of two biological replicates,  
437 with 8 representing maximum relative resistance around the exterior of the radar and 0  
438 representing complete sensitivity at the centre. MRSA isolates are in shades of blue and  
439 green. Laboratory strains *S. aureus* ATCC 25923 and 25923evo are orange and red  
440 respectively.

441

442 **S3 Fig. Phenotype microarray scores for nine *S. aureus* strains in the presence of**  
443 **antibiotics that inhibit nucleic acid synthesis.** Scores are an average of two biological  
444 replicates, with 8 representing maximum relative resistance around the exterior of the radar  
445 and 0 representing complete sensitivity at the centre. MRSA isolates are in shades of blue and  
446 green. Laboratory strains *S. aureus* ATCC 25923 and 25923evo are orange and red  
447 respectively.

448

449 **S4 Fig. Phenotype microarray scores for nine *S. aureus* strains in the presence of**  
450 **repurposed cancer and antipsychotic drugs.** Scores are an average of two biological  
451 replicates, with 8 representing maximum relative resistance around the exterior of the radar

452 and 0 representing complete sensitivity at the centre. MRSA isolates are in shades of blue and  
453 green. Laboratory strains *S. aureus* ATCC 25923 and 25923evo are orange and red  
454 respectively.

455

456 **S5 Fig. Phenotype microarray scores for nine *S. aureus* strains in the presence of**  
457 **antiseptics, disinfectants, metal ions, etc.** Scores are an average of two biological replicates,  
458 with 8 representing maximum relative resistance around the exterior of the radar and 0  
459 representing complete sensitivity at the centre. MRSA isolates are in shades of blue and  
460 green. Laboratory strains *S. aureus* ATCC 25923 and 25923evo are orange and red  
461 respectively.



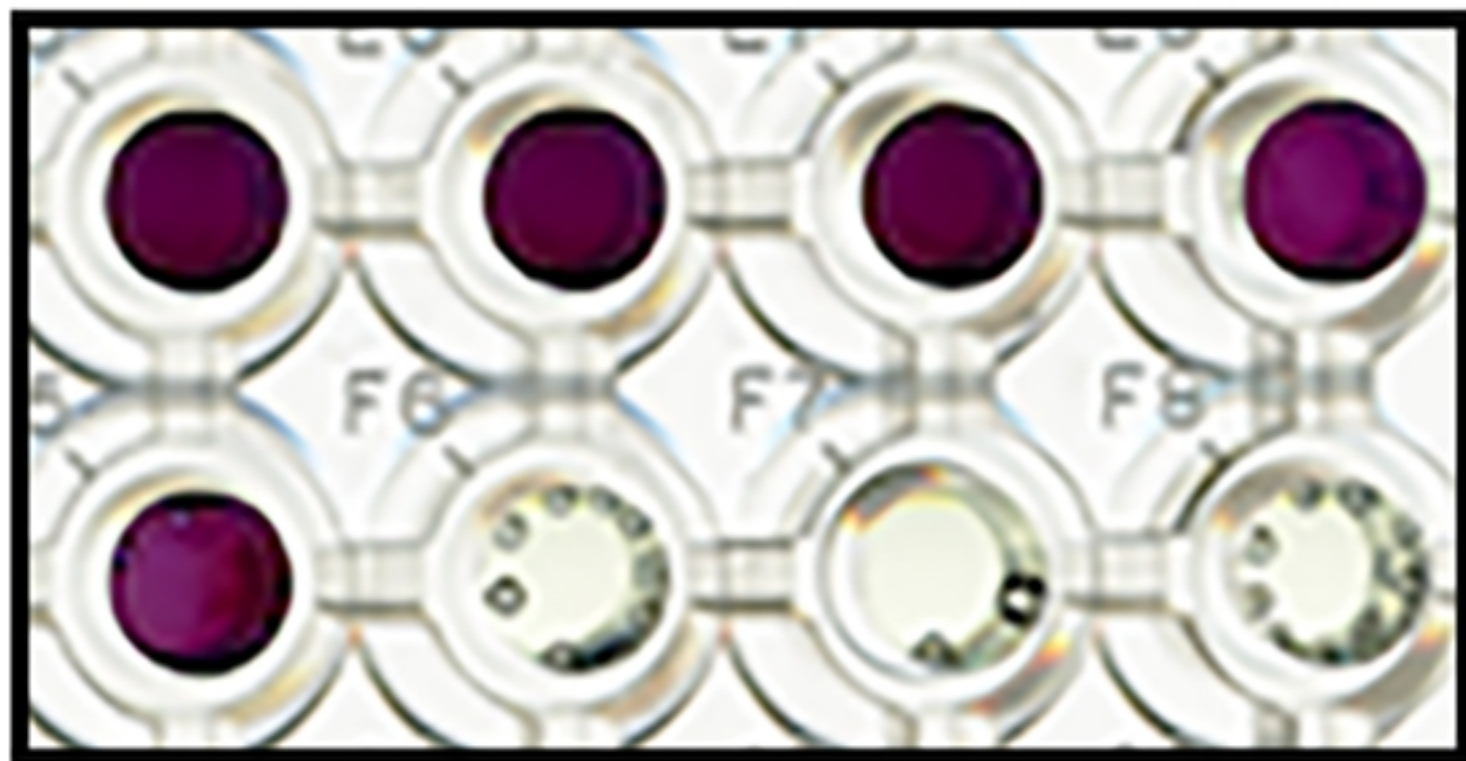

Enoxacin

Erythromycin

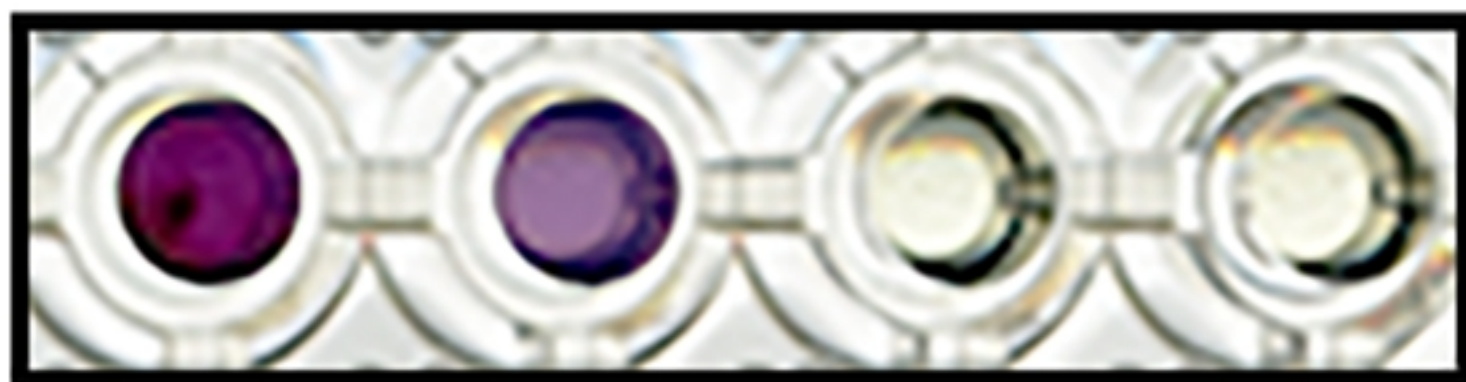

Doxycycline

Fig 1

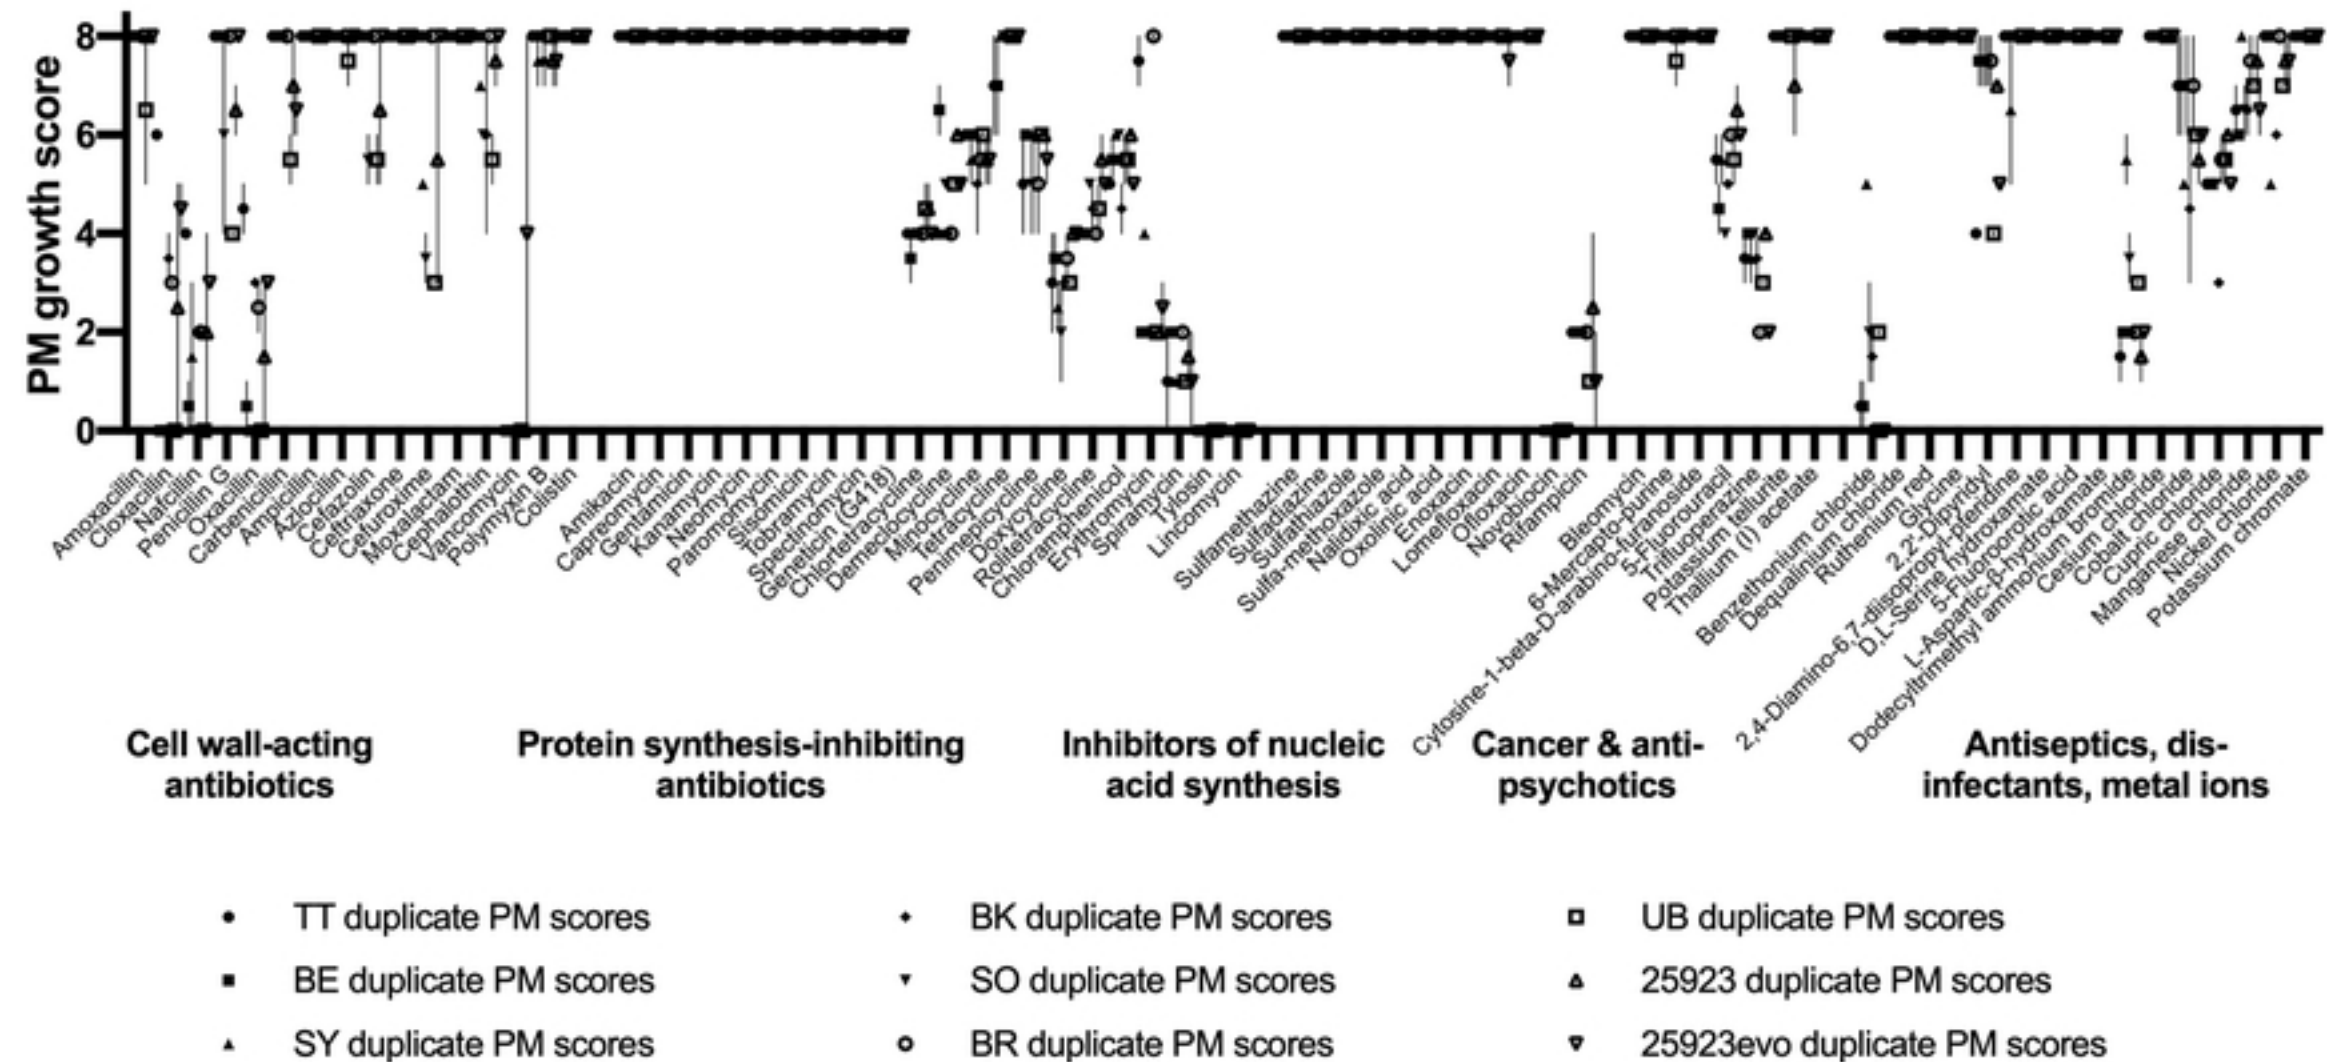

Fig 2

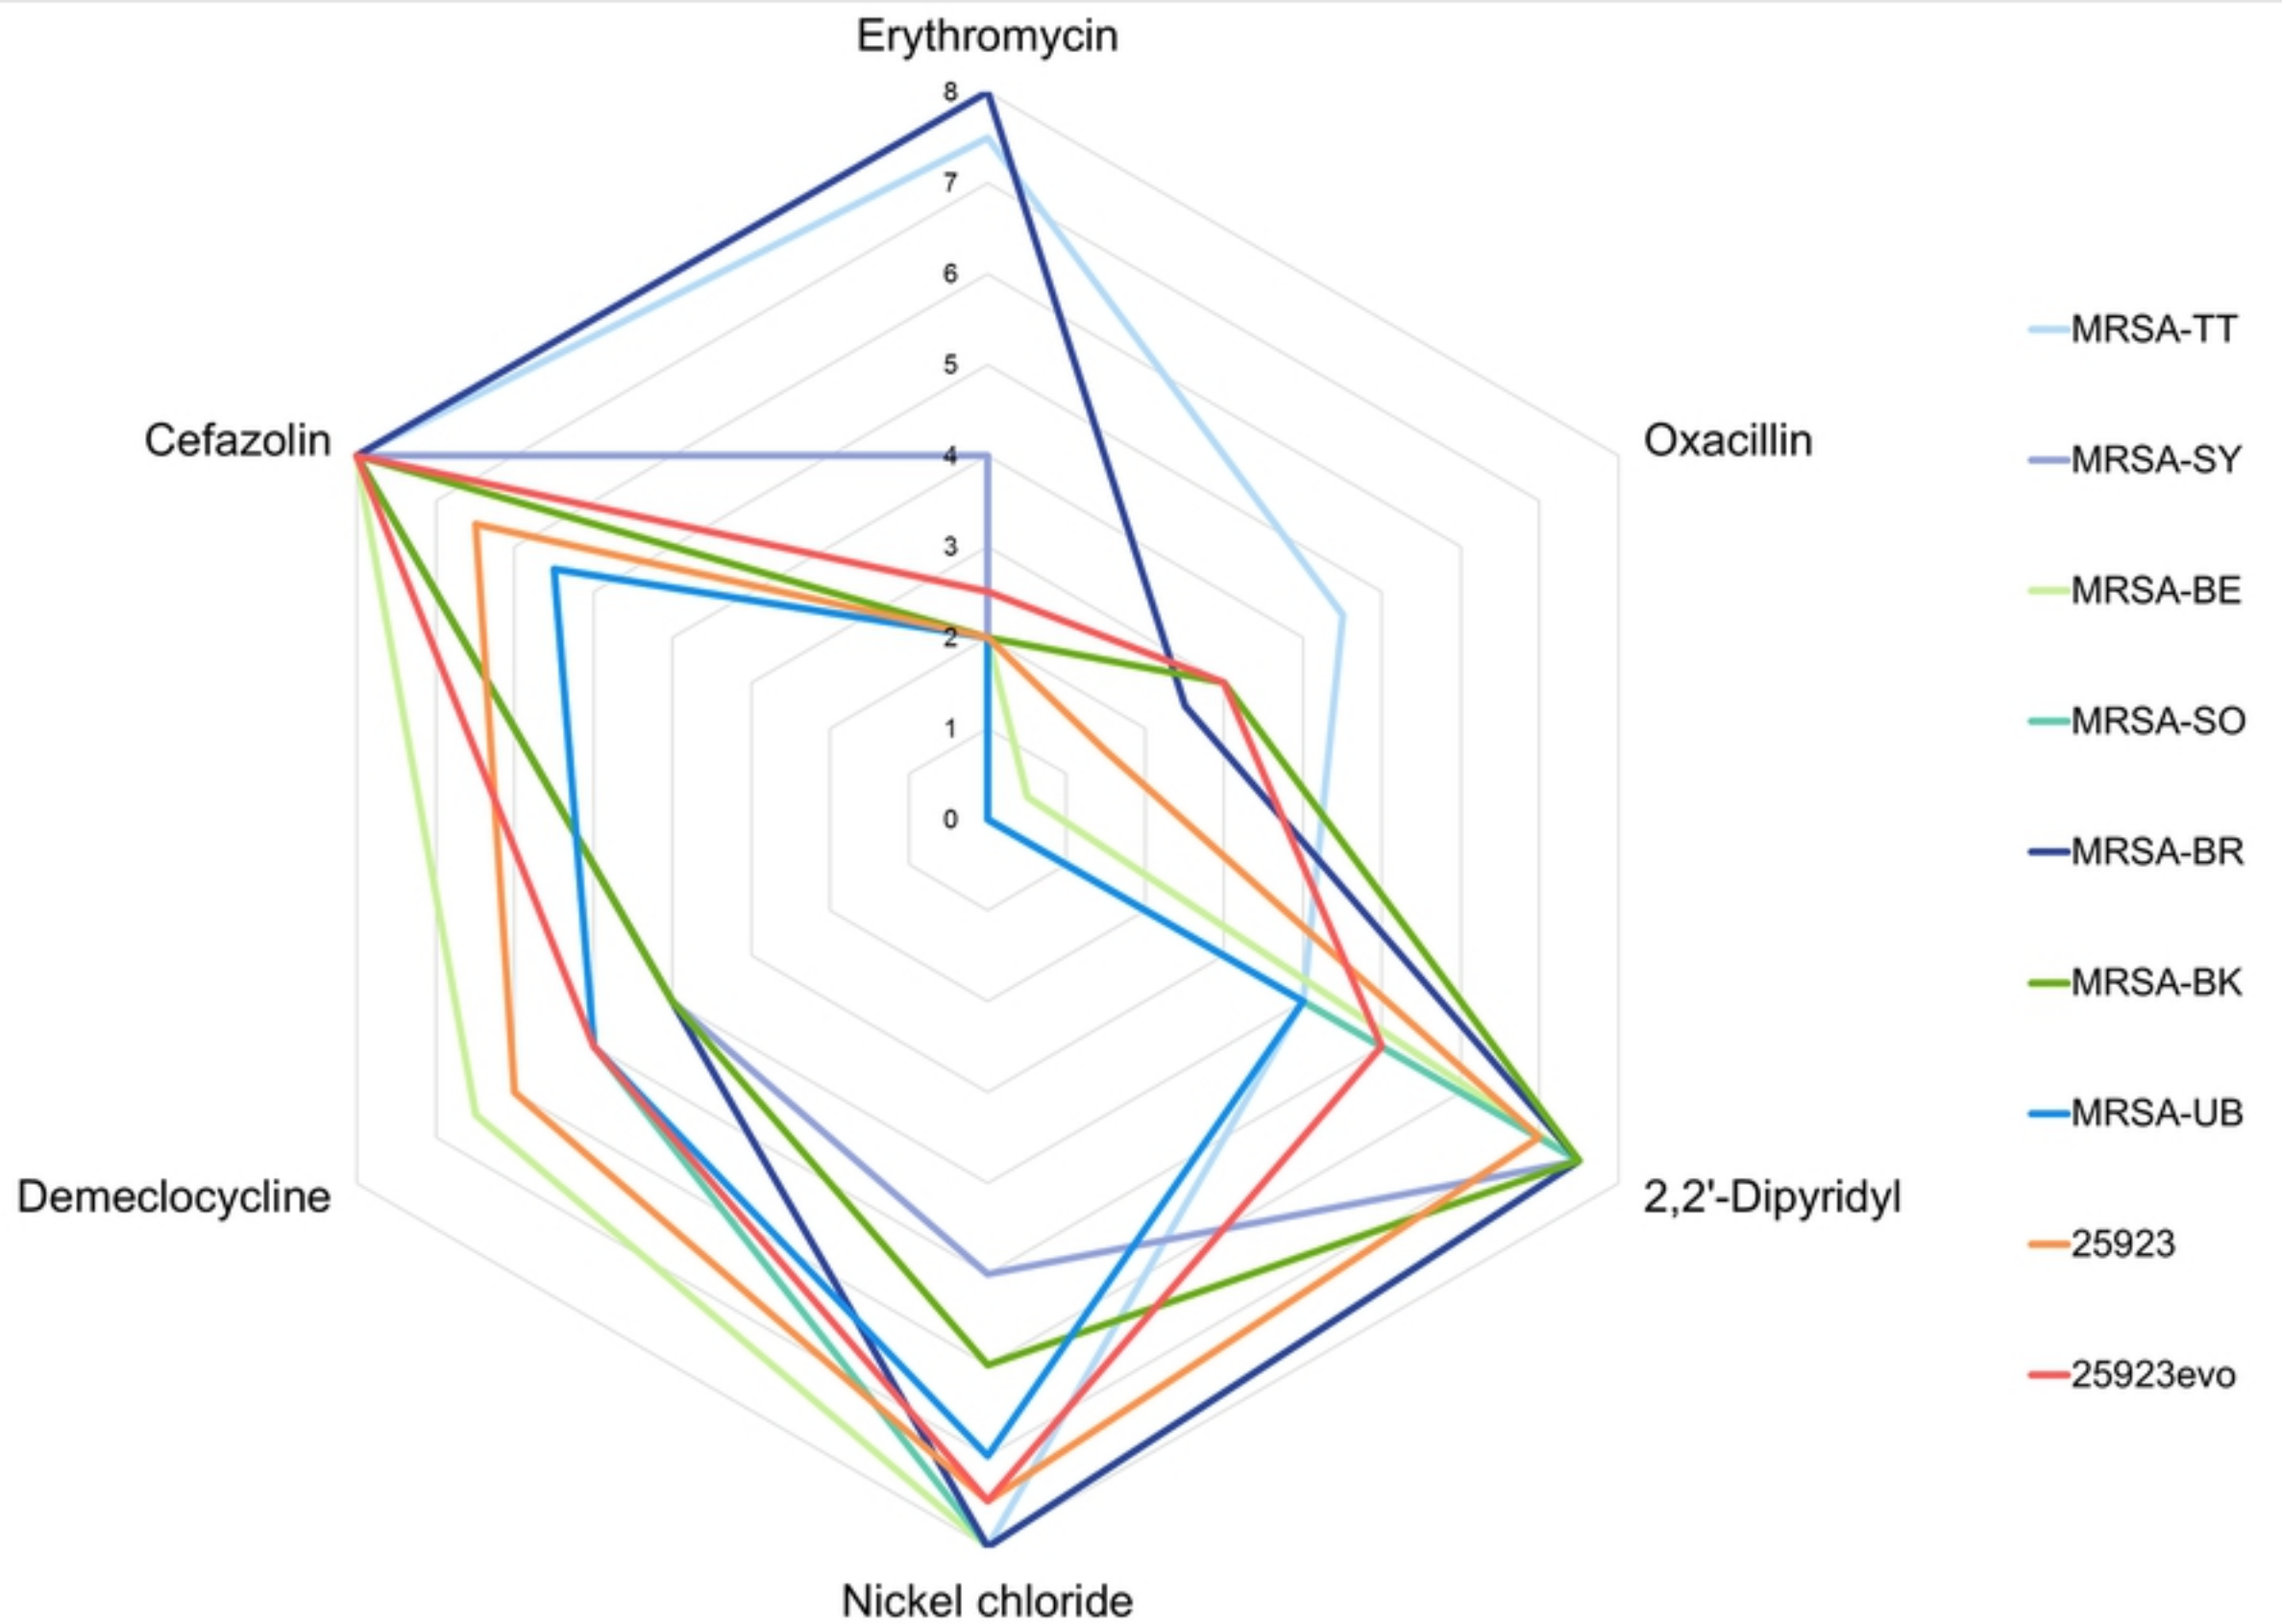

Fig 3

CLINICAL ISOLATES

| MRSA isolate | Erythromycin |           | Oxacillin |           | 2,2'-Dipyridyl |           | Nickel chloride |           | Demeclocycline |           | Cefazolin |           |
|--------------|--------------|-----------|-----------|-----------|----------------|-----------|-----------------|-----------|----------------|-----------|-----------|-----------|
|              | PM score     | MIC µg/ml | PM score  | MIC µg/ml | PM score       | MIC µg/ml | PM score        | MIC µg/ml | PM score       | MIC µg/ml | PM score  | MIC µg/ml |
| BR           | 8            | 128       | 2.5       | 0.25      | 7.5            | 512       | 8               | 128       | 4              | 0.0313    | 8         | 2         |
| TT           | 7.5          | 128       | 4.5       | 8         | 4              | 128       | 8               | 128       | 4              | 0.0156    | 8         | 16        |
| SY           | 4            | 8         | 0         | 64        | 7.5            | 64        | 5               | 64        | 4              | 0.0156    | 8         | 4         |
| SO           | 2            | 2         | 0         | < 0.125   | 7.5            | 512       | 8               | 128       | 5              | 0.0313    | 5.5       | < 0.125   |
| BE           | 2            | 8         | 0.5       | 0.25      | 7.5            | 128       | 8               | 128       | 6.5            | 0.0625    | 8         | 8         |
| UB           | 2            | 8         | 0         | < 0.125   | 4              | 64        | 7               | 64        | 5              | 0.0156    | 5.5       | < 0.125   |
| BK           | 2            | 4         | 3         | 0.25      | 7.5            | 64        | 6               | 32        | 4              | 0.0313    | 8         | 2         |

LABORATORY STRAINS

|          | Erythromycin |           | Oxacillin |           | 2,2'-Dipyridyl |           | Nickel chloride |           | Demeclocycline |           | Cefazolin |           |
|----------|--------------|-----------|-----------|-----------|----------------|-----------|-----------------|-----------|----------------|-----------|-----------|-----------|
|          | PM score     | MIC µg/ml | PM score  | MIC µg/ml | PM score       | MIC µg/ml | PM score        | MIC µg/ml | PM score       | MIC µg/ml | PM score  | MIC µg/ml |
| 25923evo | 2.5          | 4         | 3         | 1         | 5              | 256       | 7.5             | 128       | 5              | 0.0313    | 8         | 1         |
| 25923    | 2            | 4         | 1.5       | < 0.125   | 7              | 32        | 7.5             | 64        | 6              | 0.0156    | 6.5       | < 0.125   |

High variability compounds

Intermediate variability compounds

Low variability compounds

Fig 4
